# Supplementary material for: PLGA–collagen–ECM hybrid scaffolds functionalized with biomimetic extracellular matrices secreted by mesenchymal stem cells during stepwise osteogenesis-co-adipogenesis
Source: Royal Society of Chemistry journal article supplement (doi:10.1039/c9tb01959f), 2019-01-01
Supplement: c9tb01959f1.pdf [file c9tb01959f1.pdf]

## Supporting Information

### **PLGA-collagen-ECMs hybrid scaffolds functionalized with biomimetic extracellular matrices secreted by mesenchymal stem cells during stepwise osteogenesis-co-adipogenesis**

Yazhou Chen <sup>a,b</sup>, Kyubae Lee <sup>a,b</sup>, Naoki Kawazoe <sup>a</sup>, Yingnan Yang <sup>c</sup> and Guoping Chen <sup>a,b,\*</sup>

<sup>a</sup> Research Center of Functional Materials, National Institute for Materials Science, 1-1 Namiki, Tsukuba, Ibaraki 305-0044, Japan

<sup>b</sup> Department of Materials Science and Engineering, Graduate School of Pure and Applied Sciences, University of Tsukuba, 1-1-1 Tennodai, Tsukuba, Ibaraki 305-8571, Japan

<sup>c</sup> Graduate School of Life and Environmental Science, University of Tsukuba, 1-1-1 Tennodai, Tsukuba, Ibaraki 305-8571, Japan.

\*Corresponding author:

Email: Guoping.Chen@nims.go.jp; Fax: +81-29-860-4673; Tel: +81-29-860-4496

## Supporting Figures

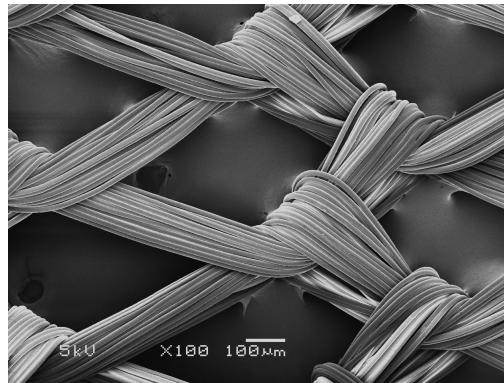

Figure S1. SEM image of PLGA mesh.

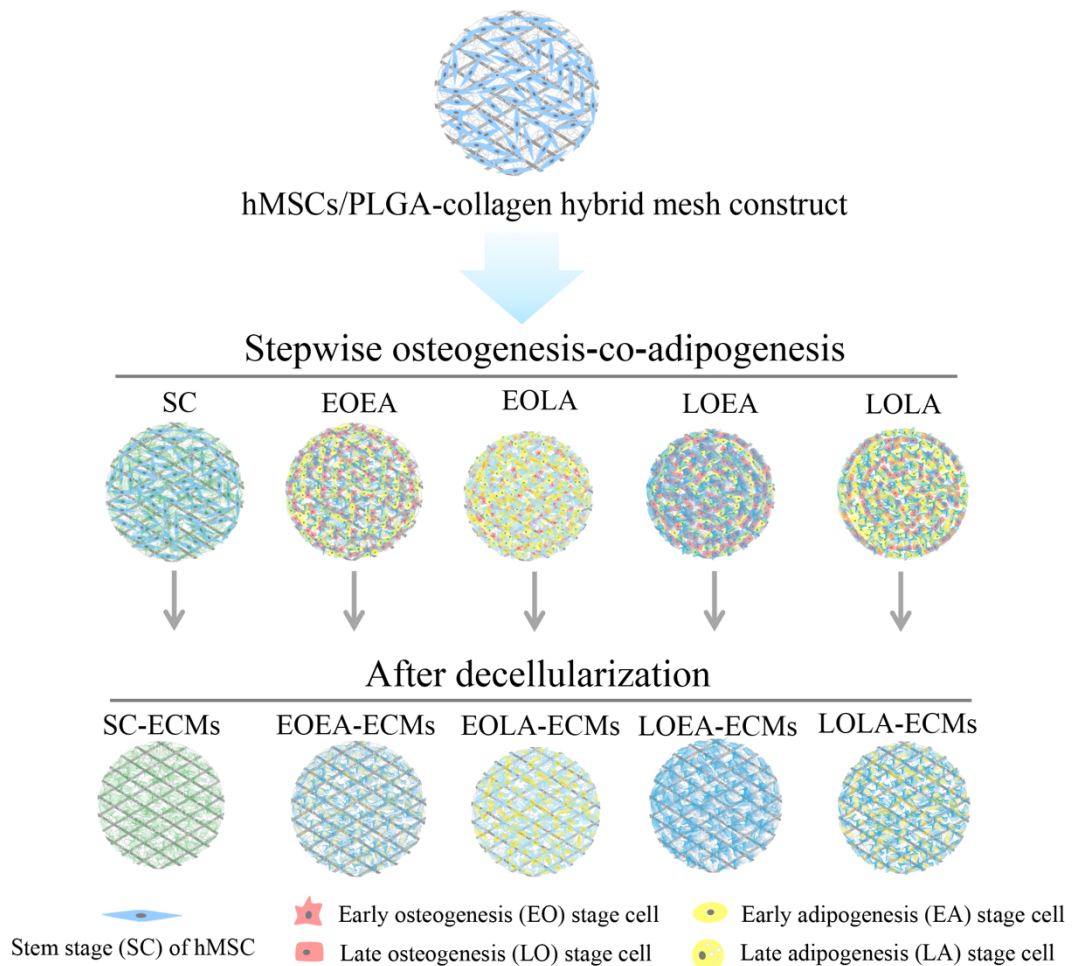

Figure S2. Preparation scheme of PLGA-collagen-ECMs hybrid meshes by decellularizing hMSCs/PLGA-collagen hybrid mesh constructs. hMSCs were controlled at different stages of osteogenesis-co-adipogenesis.

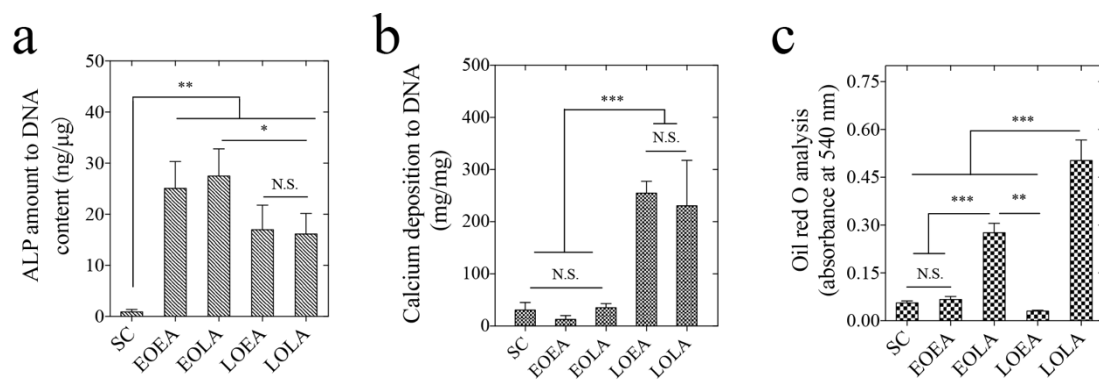

Figure S3. Quantitative analysis of ALP activity (a), calcium deposition (b) and Oil red O staining (c). Data represent means  $\pm$  S.D. (n = 3). \*,  $P < 0.05$ ; \*\*,  $P < 0.01$ ; \*\*\*,  $P < 0.001$ . N.S., no significant difference.

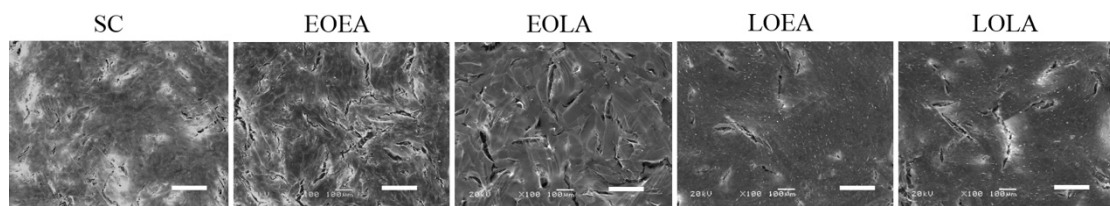

Figure S4. SEM images of the hMSCs/PLGA-collagen hybrid mesh constructs after stepwise osteogenic-co-adipogenic differentiation. Scale bar: 200 μm.

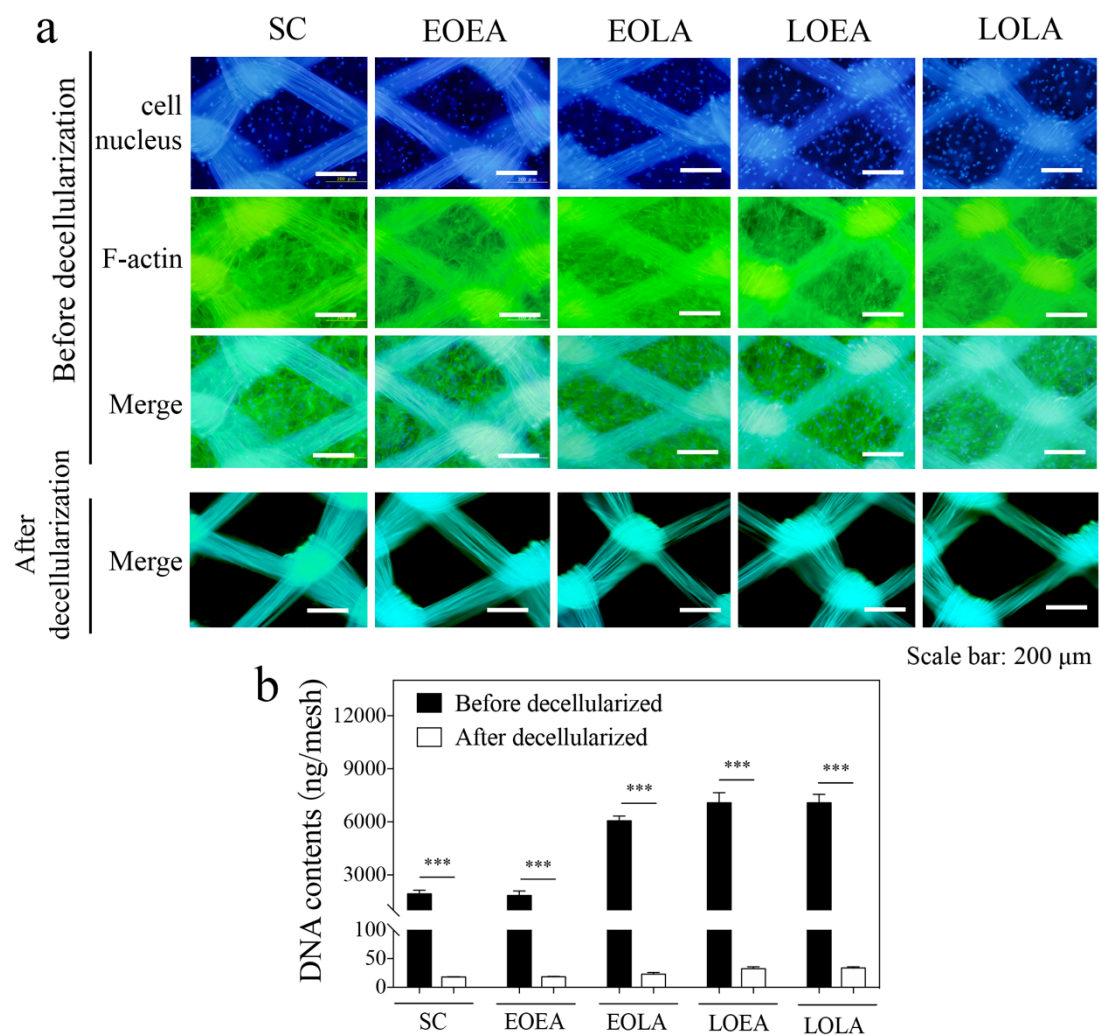

Figure S5. Decellularization of the hMSCs/PLGA-collagen hybrid mesh constructs. Cell nucleus and f-actin staining of the hMSCs/PLGA-collagen constructs before and after decellularization (a). DNA quantification of the hMSCs/PLGA-collagen hybrid mesh constructs before and after decellularization (b).

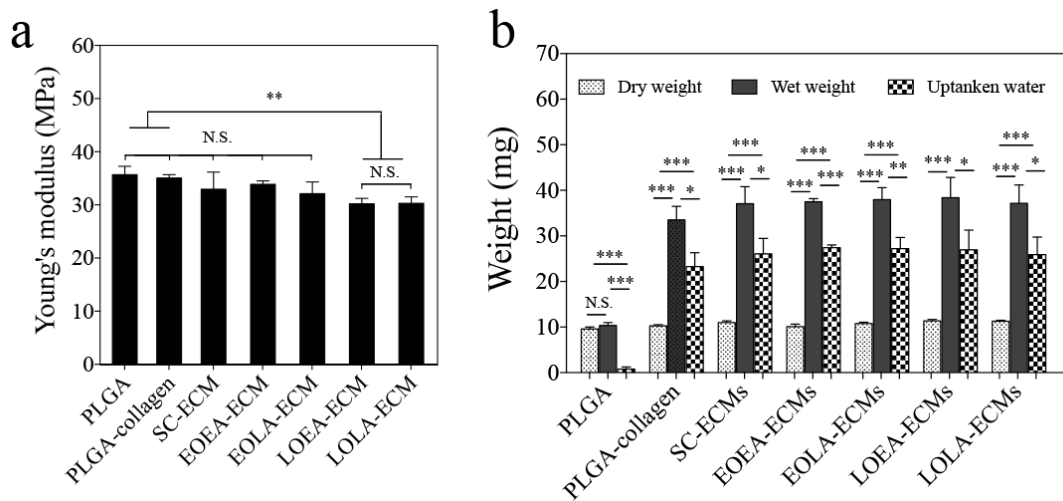

Figure S6. The mechanical properties and water uptake of PLGA-collagen and ECM-scaffolds groups.

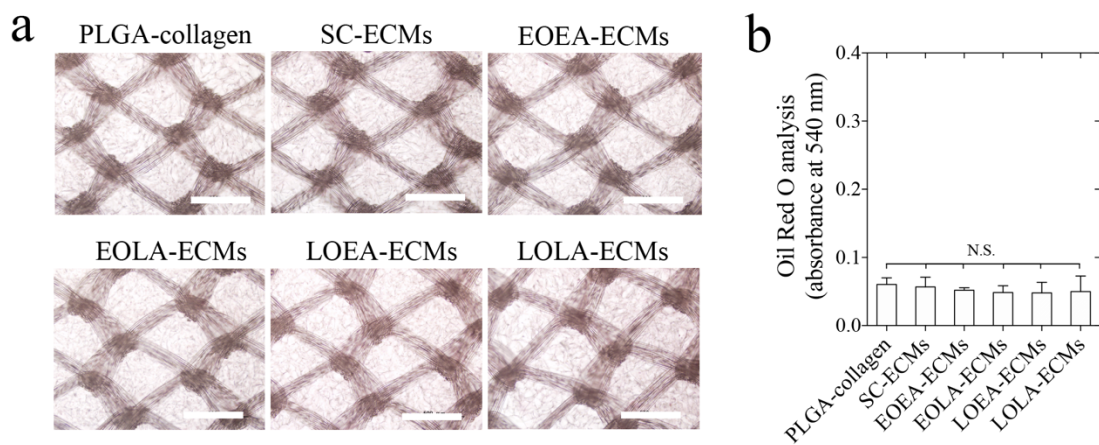

Figure S7. Measurement of the lipid vacuoles in the cells/ECMs-scaffold and cells/PLGA-collagen constructs when being cultured in basal medium. Qualitative analysis of the constructs by Oil red O staining after culture in basal medium (a), and quantitative analysis of the lipid vacuoles dye after culture in basal medium (b). Data represent means  $\pm$  S.D. (n = 3). \*, P < 0.05; N.S., no significant difference. Scale bar: 500  $\mu$ m.

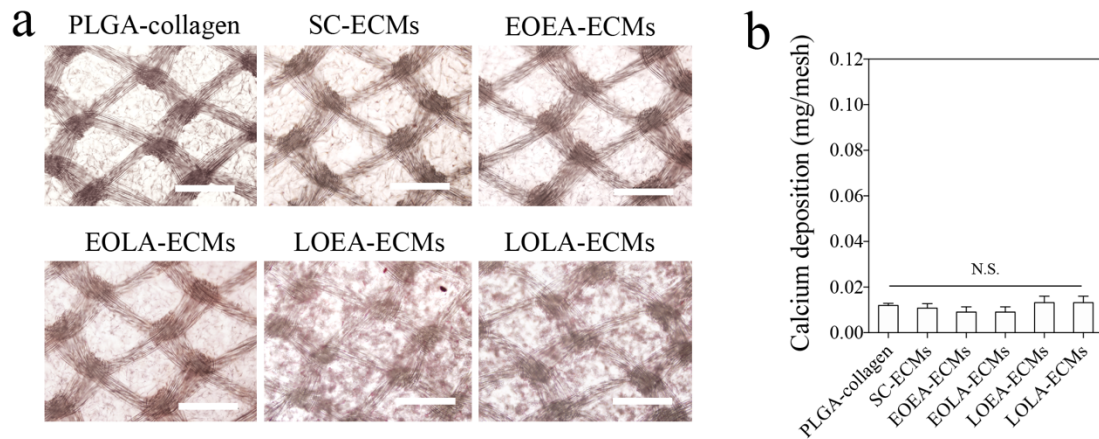

Figure S8. Measurement of the calcium deposition in the cells/ECMs-scaffold and cells/PLGA-collagen constructs when being cultured in basal medium. Qualitative analysis of the constructs by alizarin red S after culture in basal medium (a), and quantitative analysis of the calcium deposits after culture in basal medium (b). Data represent means  $\pm$  S.D. ( $n = 3$ ). \*,  $P < 0.05$ ; N.S., no significant difference. Scale bar: 500  $\mu$ m.

## Supporting Tables

Table S1. Decellularization efficiency based on DNA quantification.

| SC          | EOEA        | EOLA        | LOEA        | LOLA        |
|-------------|-------------|-------------|-------------|-------------|
| 99.1 ± 0.1% | 98.9 ± 0.3% | 99.6 ± 0.8% | 99.4 ± 0.1% | 99.3 ± 0.4% |

Table S2. Primers and probes for real-time PCR analysis.

| mRNA         | Description                                      | Oligonucleotide                                                                                                         |
|--------------|--------------------------------------------------|-------------------------------------------------------------------------------------------------------------------------|
| <i>GAPDH</i> | glyceraldehyde-3-phosphate dehydrogenase         | Hs99999905_m1<br>Forward 5'-GACCCTTGACCCCCACAAT-3'                                                                      |
| <i>ALP</i>   | Alkaline phosphatase                             | Reverse 5'-GCTCGTACTGCATGTCCCCT-3'<br>Probe 5'-TGGACTACCTATTGGGTCTCTTCGAGCCA-3'                                         |
| <i>IBSP</i>  | Bone sialoprotein 2                              | Forward 5'-TGCCTTGAGCCTGCTTCC-3'<br>Reverse 5'-GCAAAATTAAAGCAGTCTTCATTTTG-3'<br>Probe 5'-CTCCAGGACTGCCAGAGGAAGCAATCA-3' |
| <i>SPP1</i>  | Secreted phosphoprotein 1                        | Forward 5'-CTCAGGCCAGTTGCAGCC-3'<br>Reverse 5'-CAAAAGCAAATCACTGCAATTCTC-3'<br>Probe 5'-AAACGCCGACCAAGGAAAACACTACTACC-3' |
| <i>SP7</i>   | Osterix                                          | Hs00541729_m1                                                                                                           |
| <i>RUNX2</i> | Runt-related transcription factor-2              | Hs00231692_m1                                                                                                           |
| <i>PPARG</i> | Peroxisome proliferator-activated receptor gamma | Hs01115510_m1                                                                                                           |
| <i>LPL</i>   | Lipoprotein lipase                               | Hs00173425_m1                                                                                                           |
| <i>FABP4</i> | Fatty acid binding protein 4                     | Hs00609791_m1                                                                                                           |
| <i>FASN</i>  | Fatty acid synthase                              | Hs00188012_m1                                                                                                           |
| <i>CEBPA</i> | CCAAT/enhancer binding protein                   | Hs00269972_s1                                                                                                           |
